# Supplementary material
Source: PubMed Central journal article supplement (PMC7544971)
Supplement: mmc1.pdf [file mmc1.pdf]

YMTHE, Volume 28

## **Supplemental Information**

**Pronounced Therapeutic Benefit of a Single**

**Bidirectional AAV Vector Administered**

**Systemically in Sandhoff Mice**

**Hannah G. Lahey, Chelsea J. Webber, Diane Golebiowski, Cassandra M. Izzo, Erin Horn, Toloo Taghian, Paola Rodriguez, Ana Rita Batista, Lauren E. Ellis, Misako Hwang, Douglas R. Martin, Heather Gray-Edwards, and Miguel Sena-Esteves**

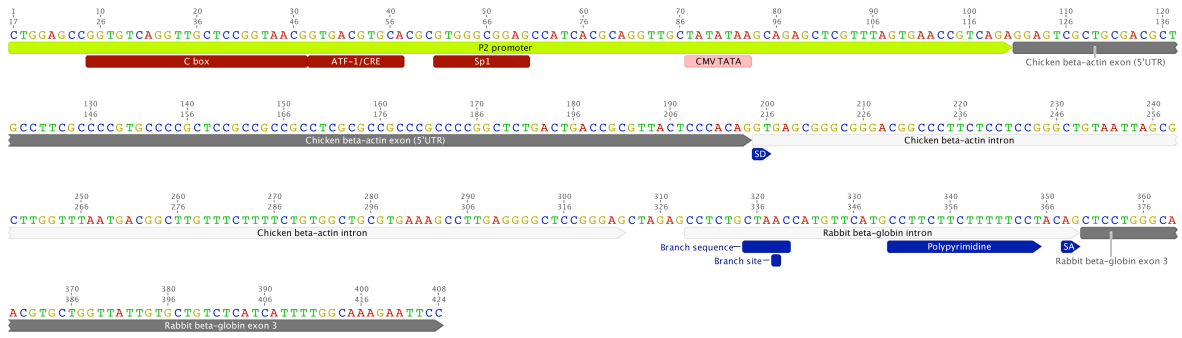

**Figure S1.** P2I promoter-intron sequence used in AAV-P2I vector to drive gene expression.  
*Abbreviations:* SD – Splicing donor; SA – Splice acceptor; CMV - cytomegalovirus
